# Supplementary material for: Dynamic Gardner cross-over in a simple glass
Source: PubMed Central journal article supplement — Proc Natl Acad Sci U S A. 2023 Jun 20;120(26):e2218218120. doi: 10.1073/pnas.2218218120 (PMC10293817; doi:10.1073/pnas.2218218120), 2023-06-20
Supplement: pnas.2218218120.sapp.pdf [file pnas.2218218120.sapp.pdf]

# PNAS Template for Supporting Information

This PNAS template for Supporting Information (SI) may be used to organize your supporting material. **Once formatted, this first page should be deleted by removing the `\instructionspage` command.** The template is intended to provide a clearly organized PDF file that will ensure readers can easily navigate to sections or specific figures and tables. Movie files or large datasets can be presented as separate files. Further information is available in the [PNAS Author Center](#).

## Using the template

Specify the title, author list, and corresponding authors with the `\title`, `\author` and `\correspondingauthor` commands. The cover page will be automatically generated with the relevant description of the SI, by the `\maketitle` command.

Figures should be placed on separate pages with legends set immediately below each figure. Table titles should be set immediately above each table. Note that tables extending beyond the width of the page can be included in the PDF or provided as separate dataset files. Oversized/nonstandard page sizes are accepted as part of your SI Appendix file.

References cited in the SI text should be included in a separate reference list at the end of this SI file: ( ? ) and ( ? ).

Supporting information for Brief Reports is limited to extended methods, essential supporting datasets, and videos (no additional tables or figures). Supporting figures and tables are not allowed for Brief Reports.

## Submitting SI

Delete this first page by removing the `\instructionspage` command, and then save your completed SI file as a PDF for submission. Further submission instructions are available [here](#).

# PNAS



18

## 19 **Supporting Information for**

### 20 **Supporting Information for Dynamic Gardner crossover in a simple glass**

21 **Qinyi Liao, Ludovic Berthier, Hai-Jun Zhou and Ning Xu**

22 **Qinyi Liao.**

23 **E-mail: [qinyi.liao.phy@gmail.com](mailto:qinyi.liao.phy@gmail.com)**

24 **Ludovic Berthier.**

25 **E-mail: [ludovic.berthier@umontpellier.fr](mailto:ludovic.berthier@umontpellier.fr)**

26 **Hai-Jun Zhou.**

27 **E-mail: [zhouhj@itp.ac.cn](mailto:zhouhj@itp.ac.cn)**

28 **Ning Xu.**

29 **E-mail: [ningxu@ustc.edu.cn](mailto:ningxu@ustc.edu.cn)**

### 30 **This PDF file includes:**

31 Supporting text

32 Figs. S1 to S7

## 33 Supporting Information Text

34 **State-following analysis for ultrastable glasses.** We compare the results using the state-following protocol used in earlier work  
35 to the results in the main text for ultrastable glass states. Specifically the state-following protocol is used from the equilibrium  
36 states of  $\varphi_g = 0.860$ , and it is compared to the ultrastable states prepared at ( $\varphi_g = 0.860, Z_s = 200, t_s = 2^{18} \times 100$ ) used in the  
37 main text. As shown in Fig. S1, the two protocols give consistent results. In both cases, the long-time limits of cage-relative  
38 MSD  $\Delta$  and mean-squared clone distances  $\langle \Delta_{ab} \rangle$  are roughly equal when  $Z < Z_G \approx 10^3$  and deviate from one another upon  
39 increasing the pressure further.

40 Therefore, the Gardner crossover using the protocols of ultrastable glass samples agrees well with the result obtained by the  
41 state-following protocol for corresponding metastable equilibrium glasses.

42 **Complex dynamics at high pressures.** To better characterise the crossover to the complex dynamics in arbitrary protocols, we  
43 compute the evolution of the probability for the clone distance to be smaller than the typical cage size,

$$44 \quad F(\Delta_{ab} \leq \langle \Delta \rangle) = \int_0^{\langle \Delta \rangle} d\Delta_{ab} P(\Delta_{ab}). \quad [1]$$

45 Here the mean-squared cage size  $\langle \Delta \rangle$  can be measured from the plateau value of  $\Delta(t_w, t)$ , and it captures the averaged size  
46 of the basins at a given  $Z$  condition, and  $P(\Delta_{ab})$  is the probability distribution function of clone mean-squared distances.  
47 For simple glasses in the absence of aging relaxation,  $P(\Delta_{ab})$  is approximately Gaussian with the mean value  $\Delta_{ab} \approx \langle \Delta \rangle$ ,  
48 corresponding to  $F \approx 0.5$ , as shown by the results for ultrastable glasses at  $Z = 200$  and  $Z = 600$  in Fig. S2(c). On the other  
49 hand, if the dynamics is dominated by aging diffusion dynamics, most of the clones jump out of the initial basin and explore  
50 different portions of the landscape. As a result,  $F(t_w)$  decreases to a smaller value as more clone distances become larger. This  
51 occurs when following ordinary and marginal glasses at relatively low pressures, see Figs. S2(a, b). Upon compression, all three  
52 glasses to high enough pressures, the dynamics becomes slow, accompanying the emergence of a complex landscape, leading  
53 to the overall decrease of  $F(t_w)$ , as shown in Fig. S2. Meanwhile, as some clones cross some barriers and fall into the same  
54 more stable sub-basins,  $F(t_w)$  grows for a long time. As shown by the results at high pressures in Fig. S2, the clone dynamics  
55 of ordinary glasses and marginal glasses is analogous to the case of ultrastable glasses, and can thus be used to determine a  
56 dynamic Gardner crossover.

57 **Robustness of Gardner physics.** We study the dynamic Gardner crossover by compressing the ordinary glasses produced  
58 at shorter  $t_s$ . As an example, we show the result of the glass prepared using the parameters of  $\varphi_g = 0.600, Z_s = 100$  and  
59  $t_s = 2^{10} \times 100$ . As shown in the main text, the dynamics of representative glass exhibits strong structural relaxations, and the  
60 plateau of the MSD  $\Delta(t)$  is nearly observed indicating the formation of transient cages. We employ these highly unstable  
61 glasses as our samples and compress them at various pressures as in the main text. In Fig. S3(a), we plot the evolution of the  
62 probability distribution of mean-squared clone distances  $P(\Delta_{ab})$  at  $Z = 400$ , from which one can see that  $P(\Delta_{ab})$  develop a  
63 peak centered at  $\langle \Delta \rangle$  with time. It suggests a dynamic Gardner crossover for this protocol. We then compute the cumulative  
64 probability  $F(t_w)$  to determine threshold pressure. As shown by Fig. S3, when increasing  $Z$  larger than  $Z_G \approx 200$ ,  $F(t_w)$  turns  
65 to increase over time which is qualitatively similar to the results of more stable glasses in Fig. S2. We thus conclude that  
66 Gardner physics is considerably robust against structural relaxation in hard disk glasses.

67 **Evidence for hierarchical dynamics.** In this section, we analyze the correspondence between sampling the glass landscape  
68 and aging dynamics for ordinary glasses by focusing on individual samples. We study representative samples prepared from  
69 compressing independent configurations at  $\phi_g = 0.600$  to  $Z_s = 100$  for  $t_s = 2^{18} \times 100$ , using  $N_c = 100$  clones for each sample.  
70 The dynamic Gardner crossover for such ordinary glasses is estimated at  $Z_G \approx 300$ . For the system size  $N = 1024$ , we  
71 observe strong sample-to-sample fluctuations. The aging behaviors are roughly classified into three categories within the time  
72 window  $\sim 3 \times 10^7$ , as illustrated in Fig. S4. The overall amplitude of the aging dynamics varies from one sample to another,  
73 corresponding to distinct evolution of the distribution of clone displacement  $P(\Delta_{ab})$ .

74 To better reveal the hierarchical structure of the landscape, we indicate the three characteristic mean-squared cage sizes  
75  $\langle \Delta \rangle$  for the protocols at  $Z = Z_s = 100, Z = Z_G = 300$ , and  $Z = 800$ . As seen in Fig. S4(d),  $P(\Delta_{ab})$  for the first sample  
76 develops a bimodal structure with increasing  $t_w$ , with two peaks centered at  $\langle \Delta \rangle(Z = 800)$  and  $\langle \Delta \rangle(Z = 300)$ . This suggests  
77 the emergency of smaller clusters of clones, where the typical distance between within each cluster is  $\langle \Delta \rangle(Z = 800)$ , while the  
78 average distance between clusters is  $\langle \Delta \rangle(Z = 300)$ .

79 As shown in the main text,  $P(\Delta_{ab})$  for the second sample develops a tail up to  $\langle \Delta \rangle(Z = 100)$ , meaning that the whole basin  
80 selected by the initial state at  $Z_s = 100$  remains dynamically accessible. Correspondingly, this sample shows stronger aging  
81 dynamics, compare to Figs. S4(a, b).

82 The third sample, shown in Figs. S4(c, f) exhibits the strongest aging dynamics among the three cases, and the clone  
83 distances can significantly exceed  $\langle \Delta \rangle(Z = 10^2)$ , implying the existence of structural relaxation beyond the initial basin. Note  
84 that this classification is empirical since the simulation duration is limited. When  $t_w$  is long enough, all samples should resemble  
85 the third example. Nevertheless, there are growing peaks at the small distances near  $\langle \Delta \rangle(Z = 800)$  at long times in all cases,  
86 indicating that some clones remain close to one another, which is indicative of Gardner physics.

87 We next visualise the topological structure of the landscape detected by the clones for the three samples at  $Z = 800$ . We  
88 plot the heat maps of clone distances  $\Delta_{ab}$  for the states in Fig. S4 in Fig. S5. The choice of clone ordering is irrelevant to the

89 structure of the data and is only useful for illustrative purposes. The current choice is based the clustering order. In the first  
90 sample, two major clusters form at intermediate time scales, and one of them shrinks at longer  $t_w$  as clones eventually end in  
91 the more stable sub-basin. This is similar to the situation seen when compressing the ultrastable glasses at  $Z > Z_G$ .

92 By contrast, the situation for the second and third samples is more complicated, since the time scales of aging events in  
93 different glass basins are close. The heatmap reveals the presence of independent basins (explored via aging relaxation) in  
94 which a hierarchical Gardner structure emerges, see Figs. S5(b, c). These hierarchical heat maps reveal the intricate structure  
95 underlying the broad distributions in Figs. S4(e, f).

96 **Susceptibility analysis for stable states.** We consider the glass states prepared by compressing the equilibrium glasses of  
97  $\varphi_g = 0.820 > \varphi_{MCT} \approx 0.795$  at  $t_s = 2^{18} \times 100$  and different  $Z_s = 10^5, 10^4, 10^3, 300$  and  $10^2$ . The Gardner crossover is found  
98 to occur near  $Z_G(\varphi_g = 0.820) \approx 200$  when using the standard state-following scheme. Thus, the glasses produced at  $Z_s \geq 200$   
99 are marginally stable.

100 When we make clones at the pressure of  $Z = Z_s$ , as in the main text, the corresponding susceptibility has the behaviour  
101 shown in Fig. S6(c). For  $Z = 10^2 < Z_G$ ,  $\chi_{AB}(t_w)$  reaches a small value  $\chi_{AB}^* \sim 3$  after a time scale  $t_w \sim 10^4$ . By contrast, the  
102 susceptibility for marginal glasses of  $Z \geq Z_G$  grows over the entire time window, owing to the slow dynamics in the presence  
103 of small barriers. We conclude that the susceptibility analysis presented in the main text provides results consistent with  
104 the state-following analysis used in previous studies when the latter can be used. In Fig. S6(a), we report the long-time  
105 distributions  $P(\Delta_{ab})$  for the same data. In line with the behavior of  $\chi_{AB}$ ,  $P(\Delta_{ab})$  is Gaussian at  $Z = 10^2$ . Upon compressing  
106 to  $Z \geq Z_G$ , there are activated events in the Gardner region. As a result,  $P(\Delta_{ab})$  extends to larger  $\Delta_{ab}$  with respect to the  
107 Gaussian distributions of short time vibrations. We also display the organization of the clones for ( $Z = 10^3, t_w = 2^{18} \times 100$ ) for  
108 a representative sample of ( $Z_s = 10^3$ ) in Fig. S6(b).

109 In summary, the analysis of marginal glasses following the analysis proposed in the main text leads to qualitatively similar  
110 findings as for ordinary glasses, even though the structural relaxation is highly suppressed for the marginal states.

111 **Susceptibilities upon approaching jamming.** In the main text, we show that the susceptibility  $\chi_{AB}$  extracted from the evolution  
112 of ordinary glasses at  $Z = Z_s$  grows with increasing pressure. Here we report the dependence of  $\chi_{AB}(t_w)$  on the density for  
113 ordinary glasses prepared at fixed ( $\varphi_g = 0.600, Z_s = 10^2$ ). When rapidly compressing these fluid states to  $Z_s > Z_{MCT}$ , the  
114 system falls out of equilibrium and undergoes evident densification at long times. Hence  $t_s$  controls the density of ordinary  
115 glasses. In Fig. S7, we show the evolution of  $\chi_{AB}(t_w)$  for the initial states generated at  $t_s = 0 - 2^{21} \times 100$ . One can see  
116 that  $\chi_{AB}(t_w)$  takes small values for short  $t_s$ . With increasing the time  $t_s$ , the stability, and density increase, the structural  
117 relaxations are less pronounced, and the long-time susceptibility becomes larger.

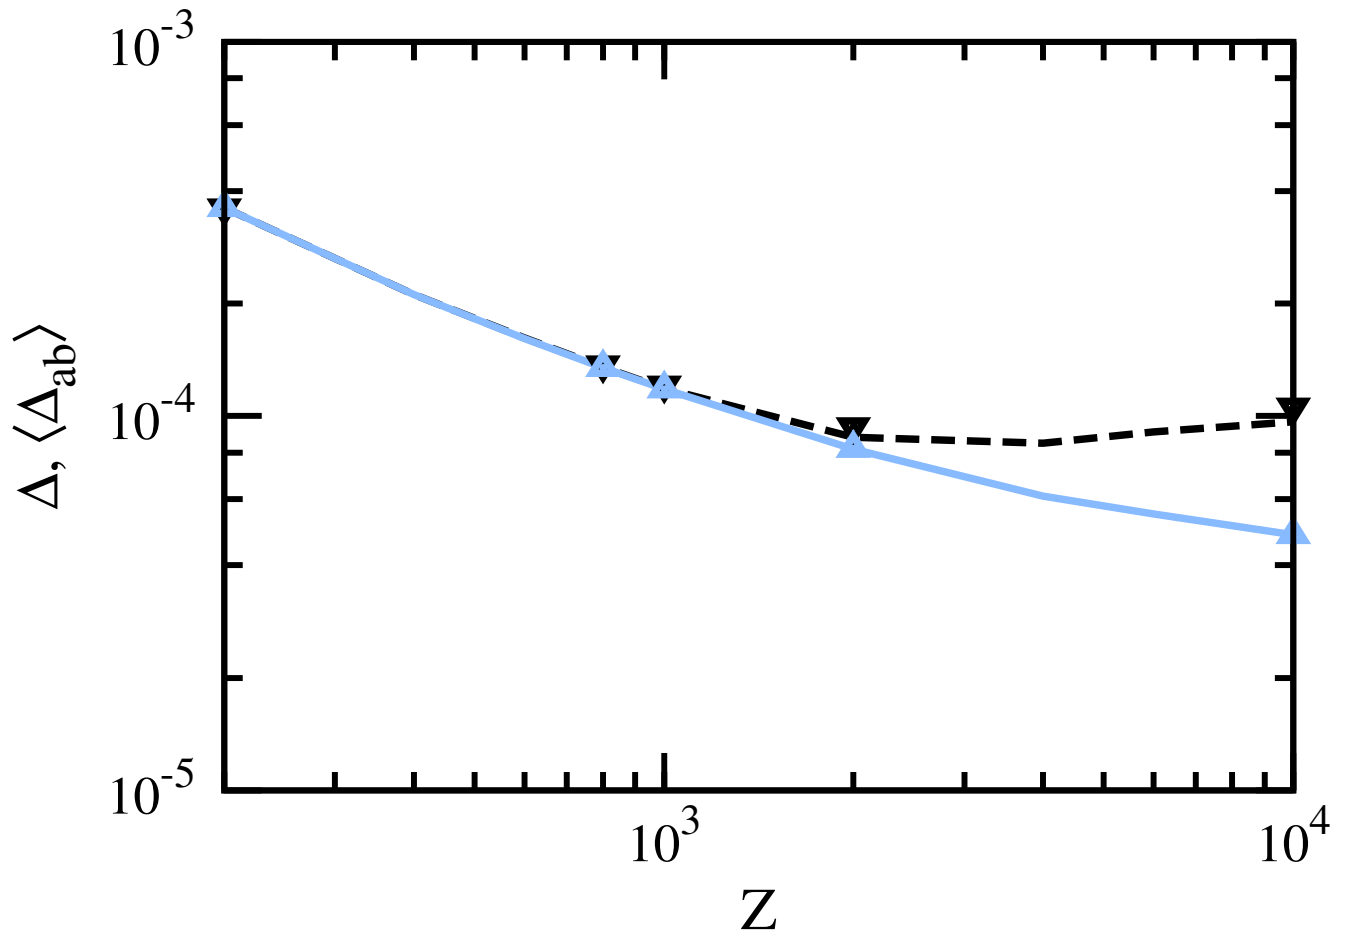

**Fig. S1.** The long-time cage-relative MSD  $\Delta$  for  $t_w = t = 2^{17} \times 100$  (blue) and the cage-relative mean-squared clone distances  $\langle \Delta_{ab} \rangle (t_w = 2^{17} \times 100)$  (black) as a function of pressure. The points are measured from the protocols described in the main for ultrastable glasses with  $(\varphi_g = 0.860, Z_s = 200, t_s = 2^{18} \times 100)$ , and the lines are the corresponding data for state-following equilibrium glasses with  $\varphi_g = 0.860$ .

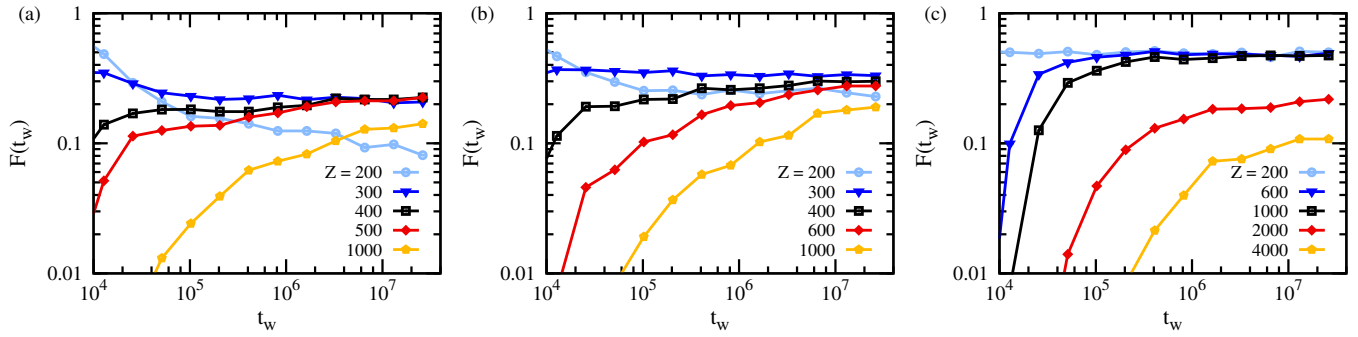

**Fig. S2.** Probability that the clone distance is smaller than the mean-squared cage size as the function of waiting time. The protocols are the same as in the main text where the systems are prepared by compressing equilibrium states at  $\varphi_g = 0.600$  in (a),  $0.820$  in (b) and  $0.860$  in (c) to  $Z_s = 200$  for a time  $t_s = 2^{18} \times 100$ , resulting in ordinary, marginal and ultrastable glasses. In all cases,  $F$  increases with  $t_w$  at high enough pressures, corresponding to falling into sub-basins. The crossovers to these dynamics are estimated at  $Z_G \approx 500, 400$ , and  $10^3$ .

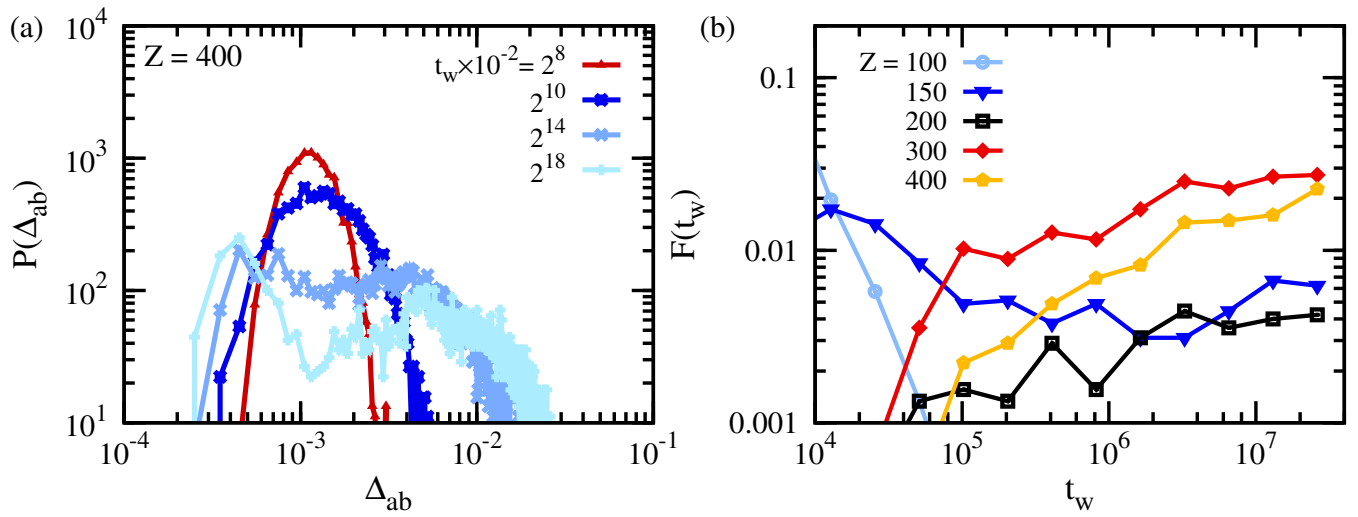

**Fig. S3.** (a) Evolution of the distributions of mean-squared cage-relative distances between clones  $P(\Delta_{ab})$  at  $Z = 400$  for the less stable samples compressed from the equilibrium states of  $\phi_g = 0.600$  on the condition of ( $Z_s = 10^2$ ,  $t_s = 2^{10} \times 100$ ) shown in the main text. (b) The cumulative probability for the clone distance being smaller than the cage size as the function of waiting time. The states are respectively generated at  $Z = 100, 150, 200, 300$  and  $400$  using the samples. The crossover is estimated at  $Z_G \approx 200$ .

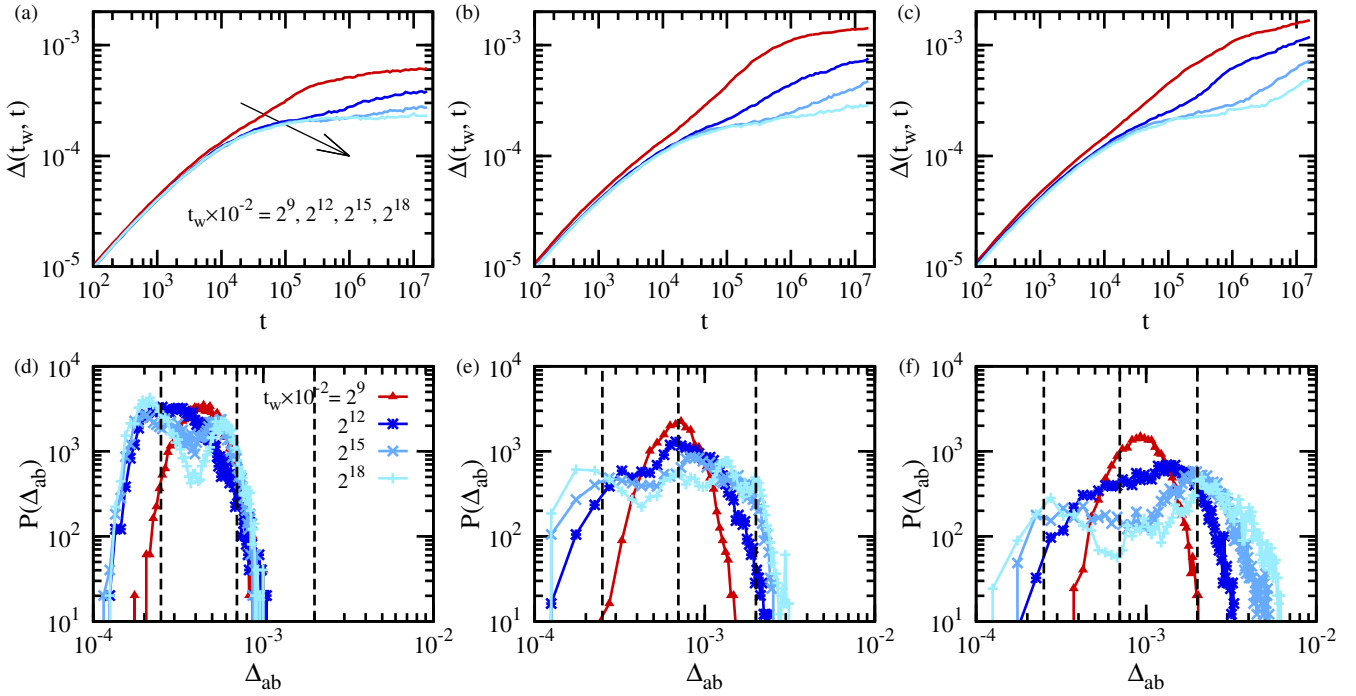

**Fig. S4.** (a-c) The cage-relative MSDs  $\Delta(t_w, t)$ s for the protocols of following three individual ordinary glass samples of ( $\varphi_g = 0.600, Z_s = 100, t_s = 2^{18} \times 100$ ) at a intermediate pressure higher than the crossover pressure  $Z = 800 > Z_G \approx 300$ .  $N_c = 100$  clones are used for each of the three samples. (d-f) The related probability distributions of clone displacement  $P(\Delta_{ab})$ s. Here the results shown in the same column correspond to the same protocol. The values of mean-squared cage sizes  $\Delta_{EA}(Z = 800) \approx 2.5 \times 10^{-4}$ ,  $\Delta_{EA}(Z = 300) \approx 7 \times 10^{-4}$  and  $\Delta_{EA}(Z = 100) \approx 2 \times 10^{-3}$  are denoted with the vertical dashed lines.



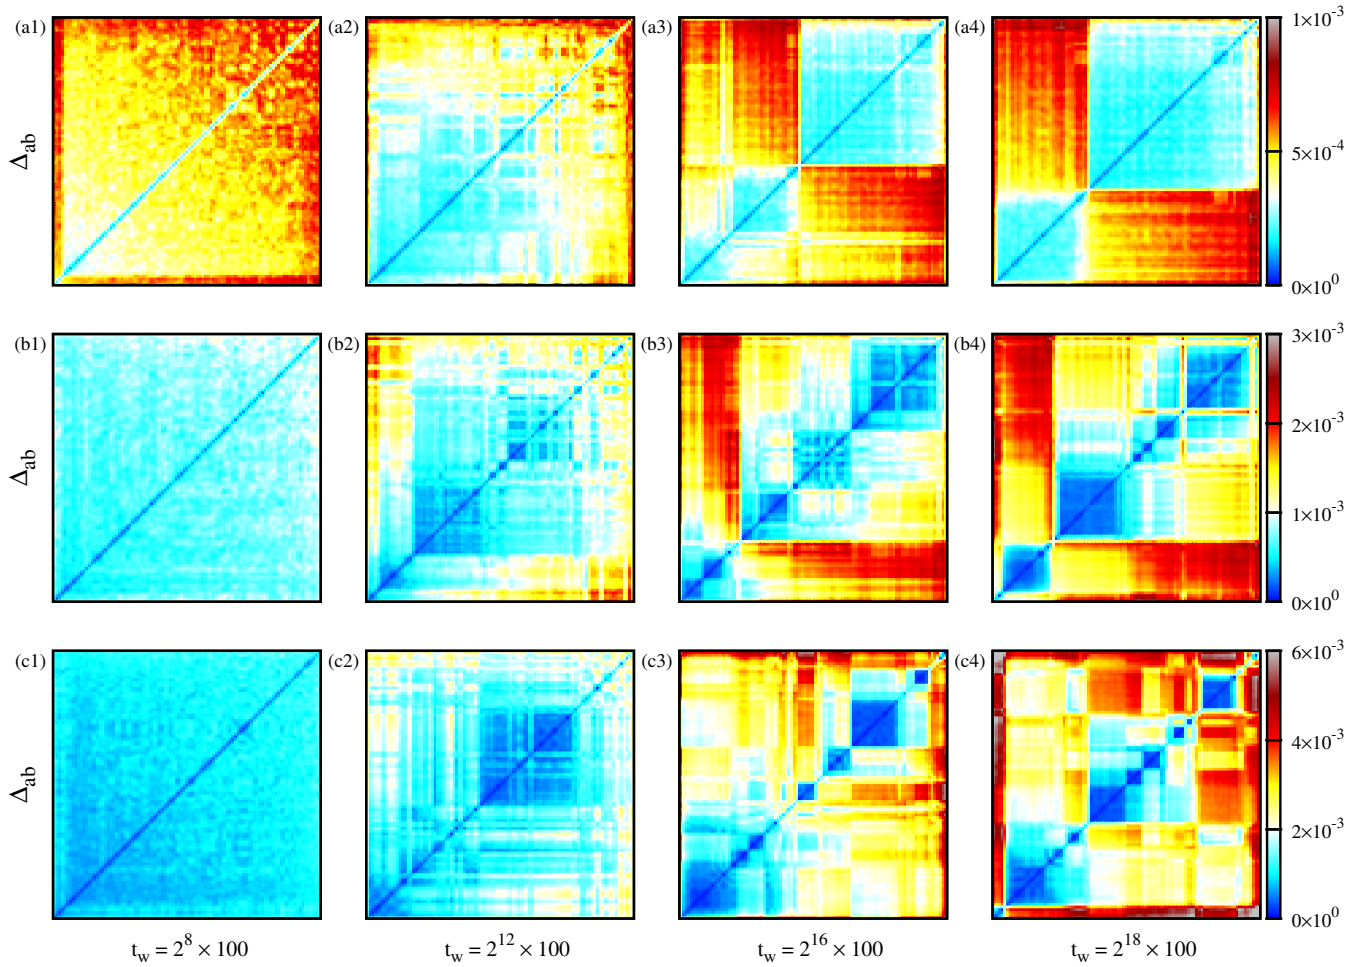

**Fig. S5.** Heat maps constructed with  $N_c = 100$  clones for  $\Delta_{ab}$  between clones copied from different ordinary glass samples taken at  $(\varphi_g = 0.600, Z_s = 10^2, t_s = 2^{18} \times 100)$  are shown in different rows. Here the following pressure is  $Z = 800$  as in Fig. S4. For each column, the waiting time after crunches is fixed and varies from  $2^8 \times 100$  to  $2^{18} \times 100$  as indicated by labels. For each sub-graph, the axes and the color represent the clone indexes and  $\Delta_{ab}$ , respectively.

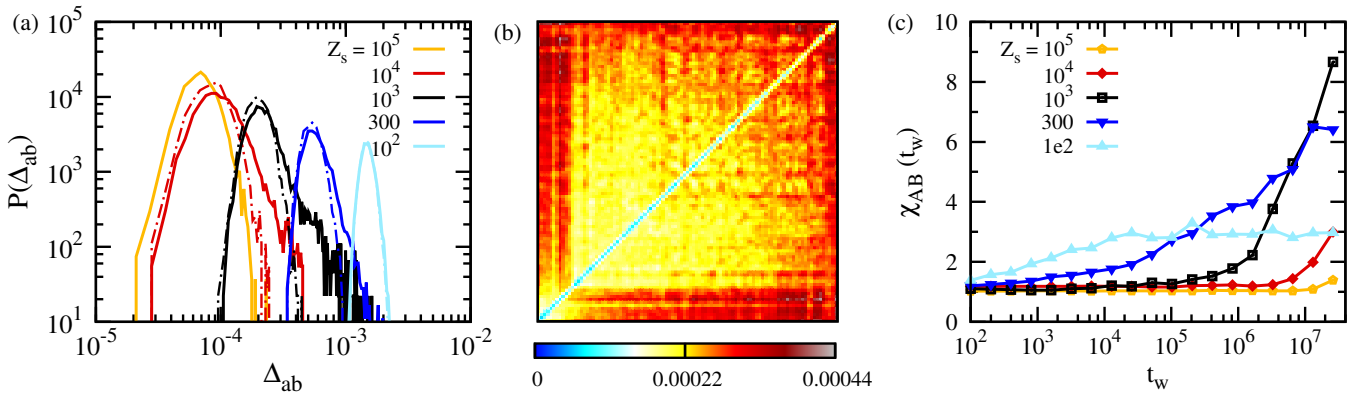

**Fig. S6.** (a) Probability distributions of mean-squared clone distances  $P(\Delta_{ab})$  for the protocol of various  $Z = Z_s$  using  $t_s = 2^{18} \times 100$  and  $(N_s = 100, N_c = 10)$  at  $t_w = 2^{18} \times 100$ . From left to right, the pressures are  $Z = Z_s = 10^5, 10^4, 10^3, 300$  and  $10^2$ . The short-time vibration behaviors are conveyed by dotted curves acting as references. At  $Z_s = 10^5$ ,  $t_w = 2^{18} \times 100$  is not long enough to form the well-defined cages. We thus are not able to present the Gaussian-like reference for  $Z_s = 10^5$ . (b) Heat map for a representative sample with  $(\varphi_g = 0.820, Z_s = 10^3, t_s = 2^{18} \times 100)$  at  $Z = Z_s$  and  $t_w = 2^{18} \times 100$ . (c) Evolution of the corresponding susceptibility  $\chi_{AB}(t_w)$  for the same protocols in (a).

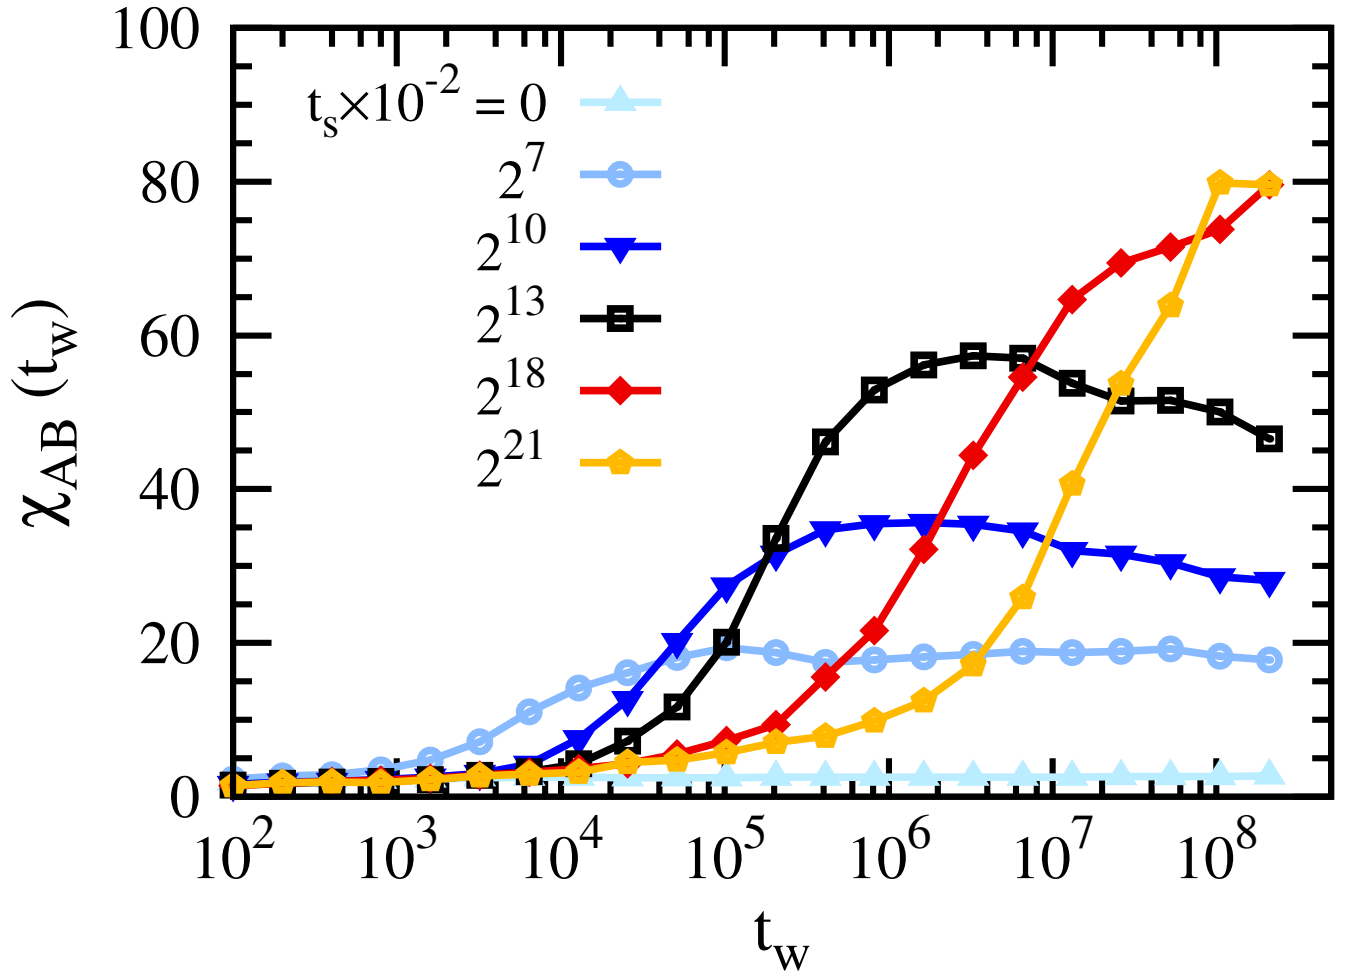

**Fig. S7.** Evolution of susceptibility  $\chi_{AB}(t_w)$  for ( $\varphi_g = 0.600, Z = Z_s = 10^2$ ) at different preparation times  $t_s$ . The corresponding packing fractions are  $\varphi_s \approx 0.8081, 0.8320, 0.8346, 0.8355$  and  $0.8361$  at  $t_s = 2^7 \times 100, 2^{10} \times 100, 2^{13} \times 100, 2^{18} \times 100$  and  $2^{21} \times 100$  respectively. With the densification at longer  $t_s$ , ordinary glasses become more stable and show larger  $\chi_{AB}^*$ .
